# Supplementary material for: Development and Validation of a Risk Prediction Model for 1‐Year Readmission Among Young Adults Hospitalized for Acute Myocardial Infarction
Source: PubMed Central journal article supplement — J Am Heart Assoc. 2021 Sep 13;10(18):e021047. doi: 10.1161/JAHA.121.021047 (PMC8649501; doi:10.1161/jaha.121.021047), 2021-09-13

# **SUPPLEMENTAL MATERIAL**

## **Data S1.**

### **Model Selection with Bayesian Model Averaging Methodology.**

Bayesian model averaging (BMA) examines all the possible combinations of candidate variables and after selecting the best one, retains a subset of others within a performance range known as Occam's window, described in detail in Madigan and Raftery (1994)<sup>48</sup>. For all variables in the subset of best fitting models, BMA subsequently calculates a posterior probability, i.e., the probability the variable is associated with the data generating process of the outcome. The choice of a posterior probability threshold for retention of a predictor in the multivariable model allows flexibility for the myriad scenarios arising from varying sample sizes, differing collections of candidate variables and multiply imputed datasets.

One issue that has not been definitively resolved in the statistical literature is how to select a risk prediction model over multiple imputations. Because missing values result in different subsets of the data at any given stage, they can bias model selection. For this reason, selection needs to take place over the multiply imputed datasets. The question then becomes how to decide on a final set of variables when different "best" models are chosen from different imputations. Having looked at different types of outcomes in a number of studies, our experience with BMA for dichotomous outcomes has consistently resulted in very parsimonious selection where the great majority of predictors receive a posterior probability of zero, with a much smaller number of predictors characterized by posterior probabilities above zero.

Our process has evolved to reviewing those predictors that exhibit a non-zero posterior probability in a majority of the imputations with our clinical experts for face validity, and subsequently accepting those that have some theoretical or mechanistic justification<sup>49-50</sup>. In this study the final predictors were those exhibiting a positive posterior probability in at least half of

the imputations. Because there are many possible ways to implement BMA, and because we wanted to allow the work to be reproducible, we chose to use the BMA package in R using the default of 50% for all priors. This prior assumes that all predictors have an equal chance of being retained in the multivariable model, which we interpret as being relatively non-informative.

We present two supplementary sources of information regarding our use of BMA. The first of these is our use of the 50% prior probabilities for each of the candidate variables used in BMA model selection, as illustrated in the following line of R code:

```
Call: bic.glm.data.frame(x = BMAvirgoAllReadImp1a, y = READ, glm.family = "binomial",  
strict = FALSE, OR = 20, maxCol = 70, nbest = 5, Prior.param = c(rep(0.5, ncol(x))))
```

The second supplemental exhibit is the following presentation of the posterior probabilities calculated by BMA (with priors listed above) for each of the candidate variables in one of the imputations. As a reference we have included a table below that defines the final model predictors followed by the posterior probabilities for our candidate predictors (those eligible for BMA) from the first imputation, where the bolded predictors are those with posterior probabilities above zero. We note that the predictor loSES (low income) has a zero posterior probability in this imputation, but because it has a non-zero probability in the majority of the imputations, it was retained.

| <b>Variable</b> | <b>Label</b>                 |
|-----------------|------------------------------|
| bPCS            | pvm_agg_phys_base            |
| bPHQ9           | baseline PHQ_9               |
| comHF           | Complication - Heart Failure |

| Variable | Label                                          |
|----------|------------------------------------------------|
| copd     | copd_core                                      |
| dm       | pvm_diabetes                                   |
| fem      | female sex                                     |
| loSES    | low income                                     |
| prMI     | pvm_previousMI                                 |
| tLOStr5  | length of stay in hospital truncated at 5 days |
| workS    | PVM_WorkingStatus                              |

**Posterior probabilities(%):**

actGu alc2 **bPHQ9** bleed bMCS **bPCS** bPSS bSQaf bSQdp bSQpl bSQts  
0.0 0.0 **100.0** 0.0 0.0 **100.0** 0.0 0.0 0.0 0.0 0.0  
cArrh cad50 chPain **comHF** **copd** dapt dispo **dm** dyslp ef40 emArr  
0.0 0.0 0.0 **58.5** **3.4** 0.0 0.0 **51.6** 0.0 0.0 0.0  
essi5 **fem** fhCVD grace hisRD hltIn htn inact lateP loSES marit  
0.0 **56.0** 0.0 0.0 0.0 0.0 0.0 0.0 0.0 0.0  
obese nStemi pEarn **prMI** reCsl smok **tLOS** white **workS**  
0.0 0.0 0.0 **93.0** 0.0 0.0 **17.5** 0.0 **3.7**

**Table S1. Initial list of 65 candidate variables for risk prediction model of 1-year readmission.**

|                                       | All patients<br>(N=2979) | All patients<br>(Missing) | No<br>readmission<br>(N=2074) | No<br>readmission<br>(Missing) | Readmission<br>within 1 year<br>(N=905) | Readmission<br>within 1<br>year<br>(Missing) | P-Value |
|---------------------------------------|--------------------------|---------------------------|-------------------------------|--------------------------------|-----------------------------------------|----------------------------------------------|---------|
| <b>Socio-Demographics/SES</b>         |                          |                           |                               |                                |                                         |                                              |         |
| Age (Mean ± SD)                       | 47.1 (6.18)              | 0 (0.0%)                  | 47.2 (6.10)                   | 0 (0.0%)                       | 46.9 (6.36)                             | 0 (0.0%)                                     | 0.1755  |
| Age, Median [IQR]                     | 48.0 (44.0,<br>52.0)     | 0 (0.0%)                  | 48.0 (44.0,<br>52.0)          | 0 (0.0%)                       | 48.0 (44.0,<br>52.0)                    | 0 (0.0%)                                     | 0.2628  |
| Sex                                   |                          | 0 (0.0%)                  |                               | 0 (0.0%)                       |                                         | 0 (0.0%)                                     | <0.0001 |
| Female                                | 2007 ( 67.4%)            |                           | 1323 ( 63.8%)                 |                                | 684 ( 75.6%)                            |                                              |         |
| Male                                  | 972 ( 32.6%)             |                           | 751 ( 36.2%)                  |                                | 221 ( 24.4%)                            |                                              |         |
| Race/Ethnicity                        |                          | 0 (0.0%)                  |                               | 0 (0.0%)                       |                                         | 0 (0.0%)                                     | 0.0001  |
| White                                 | 2289 ( 76.8%)            |                           | 1631 ( 78.6%)                 |                                | 658 ( 72.7%)                            |                                              |         |
| Black                                 | 533 (17.9%)              |                           | 323 (15.6%)                   |                                | 210 (23.2%)                             |                                              |         |
| American Indian/Alaska Native         | 33 (1.1%)                |                           | 21 (1.0%)                     |                                | 12 (1.3%)                               |                                              |         |
| Asian/Pacific Islander/East<br>Indian | 70 (2.3%)                |                           | 53 (2.6%)                     |                                | 17 (1.9%)                               |                                              |         |
| Other                                 | 51 (1.7%)                |                           | 44 (2.1%)                     |                                | 7 (0.8%)                                |                                              |         |
| Don't Know                            | 3 (0.1%)                 |                           | 2 (0.1%)                      |                                | 1 (0.1%)                                |                                              |         |
| Hispanic                              |                          | 0 (0.0%)                  |                               | 0 (0.0%)                       |                                         | 0 (0.0%)                                     | 0.0355  |
| Yes                                   | 235 (7.9%)               |                           | 183 (8.8%)                    |                                | 52 (5.7%)                               |                                              |         |
| No                                    | 2725 (91.5%)             |                           | 1878 ( 90.5%)                 |                                | 847 (93.6%)                             |                                              |         |

|                                            | All patients<br>(N=2979) | All<br>patients<br>(Missing) | No<br>readmission<br>(N=2074) | No<br>readmission<br>(Missing) | Readmission<br>within 1 year<br>(N=905) | Readmission<br>within 1<br>year<br>(Missing) | P-Value |
|--------------------------------------------|--------------------------|------------------------------|-------------------------------|--------------------------------|-----------------------------------------|----------------------------------------------|---------|
| Don't know                                 | 17 (0.6%)                |                              | 12 (0.6%)                     |                                | 5 (0.6%)                                |                                              |         |
| Patient refused                            | 2 (0.1%)                 |                              | 1 (0.0%)                      |                                | 1 (0.1%)                                |                                              |         |
| Married or Living with spouse              | 1658 ( 55.7%)            | 0 (0.0%)                     | 1207 ( 58.2%)                 | 0 (0.0%)                       | 451 ( 49.8%)                            | 0 (0.0%)                                     | <0.0001 |
| Primary earner                             | 2214 ( 74.3%)            | 0 (0.0%)                     | 1578 ( 76.1%)                 | 0 (0.0%)                       | 636 ( 70.3%)                            | 0 (0.0%)                                     | 0.0008  |
| Low income                                 | 1262 ( 42.4%)            | 0 (0.0%)                     | 793 ( 38.2%)                  | 0 (0.0%)                       | 469 ( 51.8%)                            | 0 (0.0%)                                     | <0.0001 |
| Less than high school education            | 1280 ( 43.0%)            | 0 (0.0%)                     | 864 ( 41.7%)                  | 0 (0.0%)                       | 416 ( 46.0%)                            | 0 (0.0%)                                     | 0.0319  |
| Currently employed                         | 1828 ( 61.4%)            | 0 (0.0%)                     | 1367 ( 65.9%)                 | 0 (0.0%)                       | 461 ( 50.9%)                            | 0 (0.0%)                                     | <0.0001 |
| Has Health insurance                       | 2294 ( 77.0%)            | 0 (0.0%)                     | 1588 ( 76.6%)                 | 0 (0.0%)                       | 706 ( 78.0%)                            | 0 (0.0%)                                     | 0.4427  |
| <b>Cardiac risk factors</b>                |                          |                              |                               |                                |                                         |                                              |         |
| Diabetes                                   | 1058 ( 35.5%)            | 0 (0.0%)                     | 657 ( 31.7%)                  | 0 (0.0%)                       | 401 ( 44.3%)                            | 0 (0.0%)                                     | <0.0001 |
| Obesity (BMI $\geq$ 30 kg/m <sup>2</sup> ) | 1571 ( 52.7%)            | 0 (0.0%)                     | 1069 ( 51.5%)                 | 0 (0.0%)                       | 502 ( 55.5%)                            | 0 (0.0%)                                     | 0.0528  |
| Hypertension                               | 1974 ( 66.3%)            | 0 (0.0%)                     | 1321 ( 63.7%)                 | 0 (0.0%)                       | 653 ( 72.2%)                            | 0 (0.0%)                                     | <0.0001 |
| Dyslipidemia                               | 2582 ( 86.7%)            | 0 (0.0%)                     | 1781 ( 85.9%)                 | 0 (0.0%)                       | 801 ( 88.5%)                            | 0 (0.0%)                                     | 0.0516  |
| Current Smoking                            | 891 ( 29.9%)             | 0 (0.0%)                     | 635 ( 30.6%)                  | 0 (0.0%)                       | 256 ( 28.3%)                            | 0 (0.0%)                                     | 0.2015  |
| Family History of CVD                      | 2004 ( 67.3%)            | 0 (0.0%)                     | 1373 ( 66.2%)                 | 0 (0.0%)                       | 631 ( 69.7%)                            | 0 (0.0%)                                     | 0.0833  |
| Inactivity                                 | 1054 ( 35.4%)            | 0 (0.0%)                     | 683 ( 32.9%)                  | 0 (0.0%)                       | 371 ( 41.0%)                            | 0 (0.0%)                                     | <0.0001 |
| <b>Medical History</b>                     |                          |                              |                               |                                |                                         |                                              |         |
| Prior MI                                   | 635 ( 21.3%)             | 0 (0.0%)                     | 379 ( 18.3%)                  | 0 (0.0%)                       | 256 ( 28.3%)                            | 0 (0.0%)                                     | <0.0001 |

|                                      | <b>All patients<br/>(N=2979)</b> | <b>All<br/>patients<br/>(Missing)</b> | <b>No<br/>readmission<br/>(N=2074)</b> | <b>No<br/>readmission<br/>(Missing)</b> | <b>Readmission<br/>within 1 year<br/>(N=905)</b> | <b>Readmission<br/>within 1<br/>year<br/>(Missing)</b> | <b>P-Value</b> |
|--------------------------------------|----------------------------------|---------------------------------------|----------------------------------------|-----------------------------------------|--------------------------------------------------|--------------------------------------------------------|----------------|
| History of Renal Disease             | 337 ( 11.3%)                     | 0 (0.0%)                              | 204 ( 9.8%)                            | 0 (0.0%)                                | 133 ( 14.7%)                                     | 0 (0.0%)                                               | 0.0001         |
| Alcohol Abuse                        | 1011 ( 33.9%)                    | 0 (0.0%)                              | 743 ( 35.8%)                           | 0 (0.0%)                                | 268 ( 29.6%)                                     | 0 (0.0%)                                               | 0.0010         |
| History of COPD                      | 346 ( 11.6%)                     | 0 (0.0%)                              | 198 ( 9.5%)                            | 0 (0.0%)                                | 148 ( 16.4%)                                     | 0 (0.0%)                                               | <0.0001        |
| History of stroke                    | 100 ( 3.4%)                      | 0 (0.0%)                              | 56 ( 2.7%)                             | 0 (0.0%)                                | 44 ( 4.9%)                                       | 0 (0.0%)                                               | 0.0024         |
| History of heart failure             | 137 ( 4.6%)                      | 0 (0.0%)                              | 57 ( 2.7%)                             | 0 (0.0%)                                | 80 ( 8.8%)                                       | 0 (0.0%)                                               | <0.0001        |
| History of PAD                       | 74 ( 2.5%)                       | 0 (0.0%)                              | 32 ( 1.5%)                             | 0 (0.0%)                                | 42 ( 4.6%)                                       | 0 (0.0%)                                               | <0.0001        |
| History of recreational drug use     | 46 ( 1.5%)                       | 0 (0.0%)                              | 26 ( 1.3%)                             | 0 (0.0%)                                | 20 ( 2.2%)                                       | 0 (0.0%)                                               | 0.0516         |
| <b>Presentation Characteristics</b>  |                                  |                                       |                                        |                                         |                                                  |                                                        |                |
| Transferred from another institution | 1246 (41.8%)                     | 0 (0.0%)                              | 889 (42.9%)                            | 0 (0.0%)                                | 357 (39.4%)                                      | 0 (0.0%)                                               | 0.0821         |
| First health service used            |                                  | 0 (0.0%)                              |                                        | 0 (0.0%)                                |                                                  | 0 (0.0%)                                               | 0.3395         |
| Directly ER from Home                | 2654 ( 89.1%)                    |                                       | 1852 ( 89.3%)                          |                                         | 802 ( 88.6%)                                     |                                                        |                |
| Before ER, Dr Office                 | 162 ( 5.4%)                      |                                       | 105 ( 5.1%)                            |                                         | 57 ( 6.3%)                                       |                                                        |                |
| Before ER, other health services     | 163 ( 5.5%)                      |                                       | 117 ( 5.6%)                            |                                         | 46 ( 5.1%)                                       |                                                        |                |
| Late Presentation >6h                | 1319 ( 44.3%)                    | 0 (0.0%)                              | 894 ( 43.1%)                           | 0 (0.0%)                                | 425 ( 47.0%)                                     | 0 (0.0%)                                               | 0.0538         |
| ASA at arrival                       | 2857 ( 95.9%)                    | 0 (0.0%)                              | 2000 ( 96.4%)                          | 0 (0.0%)                                | 857 ( 94.7%)                                     | 0 (0.0%)                                               | 0.2647         |
| Ejection Fraction <40%               | 319 ( 10.7%)                     | 0 (0.0%)                              | 209 ( 10.1%)                           | 0 (0.0%)                                | 110 ( 12.2%)                                     | 0 (0.0%)                                               | 0.0849         |

|                                                  | <b>All patients<br/>(N=2979)</b> | <b>All<br/>patients<br/>(Missing)</b> | <b>No<br/>readmission<br/>(N=2074)</b> | <b>No<br/>readmission<br/>(Missing)</b> | <b>Readmission<br/>within 1 year<br/>(N=905)</b> | <b>Readmission<br/>within 1<br/>year<br/>(Missing)</b> | <b>P-Value</b> |
|--------------------------------------------------|----------------------------------|---------------------------------------|----------------------------------------|-----------------------------------------|--------------------------------------------------|--------------------------------------------------------|----------------|
| Angiogram                                        |                                  | 317 ( 10.6%)                          |                                        | 208 ( 10.0%)                            |                                                  | 109 ( 12.0%)                                           | 0.0333         |
| Non-obstructive CAD <50%                         | 257 ( 8.6%)                      |                                       | 195 ( 9.4%)                            |                                         | 62 ( 6.9%)                                       |                                                        |                |
| Obstructive CAD >=50%                            | 2405 ( 80.7%)                    |                                       | 1671 ( 80.6%)                          |                                         | 734 ( 81.1%)                                     |                                                        |                |
| Peak Troponin (Mean ± SD)                        | 26.7 (55.50)                     | 33 (1.1%)                             | 27.4 (55.77)                           | 23 (1.1%)                               | 25.2 (54.90)                                     | 10 (1.1%)                                              | 0.3170         |
| Estimated Glomerular Filtration Rate (eGFR)      | 88.3 (24.26)                     | 12 (0.4%)                             | 89.3 (22.83)                           | 8 (0.4%)                                | 86.1 (27.14)                                     | 4 (0.4%)                                               | 0.0023         |
| First White Blood Cell Count                     | 10.8 (3.90)                      | 12 (0.4%)                             | 10.8 (3.87)                            | 6 (0.3%)                                | 10.7 (3.96)                                      | 6 (0.7%)                                               | 0.2272         |
| First Hematocrit                                 | 41.0 (5.23)                      | 13 (0.4%)                             | 41.4 (4.95)                            | 6 (0.3%)                                | 40.2 (5.75)                                      | 7 (0.8%)                                               | <0.0001        |
| Chest pain as primary symptom                    | 2600 ( 87.3%)                    | 0 (0.0%)                              | 1830 ( 88.2%)                          | 0 (0.0%)                                | 770 ( 85.1%)                                     | 0 (0.0%)                                               | 0.0176         |
| Killip class                                     |                                  | 156 ( 5.2%)                           |                                        | 112 ( 5.4%)                             |                                                  | 44 ( 4.9%)                                             | 0.0056         |
| I (no rales)                                     | 2705 ( 90.8%)                    |                                       | 1897 ( 91.5%)                          |                                         | 808 ( 89.3%)                                     |                                                        |                |
| II (rales in bases / S3)                         | 83 ( 2.8%)                       |                                       | 46 ( 2.2%)                             |                                         | 37 ( 4.1%)                                       |                                                        |                |
| III (rales over 1/2 the lungs / Pulmonary edema) | 22 ( 0.7%)                       |                                       | 11 ( 0.5%)                             |                                         | 11 ( 1.2%)                                       |                                                        |                |
| IV (Cardiogenic shock)                           | 13 ( 0.4%)                       |                                       | 8 ( 0.4%)                              |                                         | 5 ( 0.6%)                                        |                                                        |                |
| Prior coronary artery bypass grafting (CABG)     | 115 ( 3.9%)                      | 0 (0.0%)                              | 59 ( 2.8%)                             | 0 (0.0%)                                | 56 ( 6.2%)                                       | 0 (0.0%)                                               | <0.0001        |
| Type of Myocardial Infarction                    |                                  | 0 (0.0%)                              |                                        | 0 (0.0%)                                |                                                  | 0 (0.0%)                                               | 0.0096         |



|                                                   | All patients<br>(N=2979) | All<br>patients<br>(Missing) | No<br>readmission<br>(N=2074) | No<br>readmission<br>(Missing) | Readmission<br>within 1 year<br>(N=905) | Readmission<br>within 1<br>year<br>(Missing) | P-Value |
|---------------------------------------------------|--------------------------|------------------------------|-------------------------------|--------------------------------|-----------------------------------------|----------------------------------------------|---------|
| STEMI                                             | 1483 ( 49.8%)            |                              | 1065 ( 51.4%)                 |                                | 418 ( 46.2%)                            |                                              |         |
| NSTEMI                                            | 1496 ( 50.2%)            |                              | 1009 ( 48.6%)                 |                                | 487 ( 53.8%)                            |                                              |         |
| Grace Score (Mean ± SD)                           | 75.2 (19.05)             | 49 (1.6%)                    | 74.6 (18.00)                  | 23 (1.1%)                      | 76.6 (21.26)                            | 26 (2.9%)                                    | 0.0145  |
| Conservative treatment                            | 89 ( 3.0%)               | 0 (0.0%)                     | 51 ( 2.5%)                    | 0 (0.0%)                       | 38 ( 4.2%)                              | 0 (0.0%)                                     | 0.0103  |
| Total length of stay in Days,<br>Mean (SD)        | 4.2 (3.93)               | 13 (0.4%)                    | 3.9 (3.41)                    | 8 (0.4%)                       | 4.9 (4.85)                              | 5 (0.6%)                                     | <0.0001 |
| Disposition to other institutions<br>at discharge | 2806 ( 94.2%)            | 0 (0.0%)                     | 1962 ( 94.6%)                 | 0 (0.0%)                       | 844 ( 93.3%)                            | 0 (0.0%)                                     | 0.0071  |
| Admitted to CCU/ICU                               | 130 ( 4.4%)              | 0 (0.0%)                     | 90 ( 4.3%)                    | 0 (0.0%)                       | 40 ( 4.4%)                              | 0 (0.0%)                                     | 0.9213  |
| <b>Discharge Counseling</b>                       |                          |                              |                               |                                |                                         |                                              |         |
| Recommended Counselling<br>(Cardiac+Diet+Smoking) | 951 ( 31.9%)             | 0 (0.0%)                     | 674 ( 32.5%)                  | 0 (0.0%)                       | 277 ( 30.6%)                            | 0 (0.0%)                                     | 0.3089  |
| Medication Counselling                            | 2937 ( 98.6%)            | 0 (0.0%)                     | 2047 ( 98.7%)                 | 0 (0.0%)                       | 890 ( 98.3%)                            | 0 (0.0%)                                     | 0.4490  |
| Exercise Counselling                              | 2751 ( 92.3%)            | 0 (0.0%)                     | 1913 ( 92.2%)                 | 0 (0.0%)                       | 838 ( 92.6%)                            | 0 (0.0%)                                     | 0.7343  |
| CLOP/Thienopyridines                              | 2052 ( 68.9%)            | 0 (0.0%)                     | 1442 ( 69.5%)                 | 0 (0.0%)                       | 610 ( 67.4%)                            | 0 (0.0%)                                     | 0.2495  |
| Statins                                           | 2739 ( 91.9%)            | 0 (0.0%)                     | 1903 ( 91.8%)                 | 0 (0.0%)                       | 836 ( 92.4%)                            | 0 (0.0%)                                     | 0.5671  |
| Dual Antiplatelet Therapy                         | 1964 ( 65.9%)            | 0 (0.0%)                     | 1389 ( 67.0%)                 | 0 (0.0%)                       | 575 ( 63.5%)                            | 0 (0.0%)                                     | 0.0688  |
| ACEi/ARBs                                         | 1915 ( 64.3%)            | 0 (0.0%)                     | 1331 ( 64.2%)                 | 0 (0.0%)                       | 584 ( 64.5%)                            | 0 (0.0%)                                     | 0.8525  |
| Beta Blockers                                     | 2713 ( 91.1%)            | 0 (0.0%)                     | 1895 ( 91.4%)                 | 0 (0.0%)                       | 818 ( 90.4%)                            | 0 (0.0%)                                     | 0.3871  |

|                                         | All patients<br>(N=2979) | All<br>patients<br>(Missing) | No<br>readmission<br>(N=2074) | No<br>readmission<br>(Missing) | Readmission<br>within 1 year<br>(N=905) | Readmission<br>within 1<br>year<br>(Missing) | P-Value |
|-----------------------------------------|--------------------------|------------------------------|-------------------------------|--------------------------------|-----------------------------------------|----------------------------------------------|---------|
| Calcium Channel Blocker                 | 148 ( 5.0%)              | 0 (0.0%)                     | 97 ( 4.7%)                    | 0 (0.0%)                       | 51 ( 5.6%)                              | 0 (0.0%)                                     | 0.2682  |
| <b>In-hospital complications</b>        |                          |                              |                               |                                |                                         |                                              |         |
| Bleeding                                | 197 ( 6.6%)              | 0 (0.0%)                     | 133 ( 6.4%)                   | 0 (0.0%)                       | 64 ( 7.1%)                              | 0 (0.0%)                                     | 0.5056  |
| Re-infarction                           | 28 ( 0.9%)               | 0 (0.0%)                     | 15 ( 0.7%)                    | 0 (0.0%)                       | 13 ( 1.4%)                              | 0 (0.0%)                                     | 0.0641  |
| Heart failure                           | 215 ( 7.2%)              | 0 (0.0%)                     | 118 ( 5.7%)                   | 0 (0.0%)                       | 97 ( 10.7%)                             | 0 (0.0%)                                     | <0.0001 |
| Cardiac arrhythmias                     | 205 ( 6.9%)              | 0 (0.0%)                     | 132 ( 6.4%)                   | 0 (0.0%)                       | 73 ( 8.1%)                              | 0 (0.0%)                                     | 0.0923  |
| <b>Psychosocial factors</b> (Mean ± SD) |                          |                              |                               |                                |                                         |                                              |         |
| Social Support (ESSI-5)                 | 21.3 (4.56)              | 57 (1.9%)                    | 21.5 (4.34)                   | 33 (1.6%)                      | 20.9 (5.01)                             | 24 (2.7%)                                    | 0.0058  |
| Depression (PHQ-9)                      | 7.8 (6.45)               | 117 (3.9%)                   | 7.2 (6.21)                    | 71 (3.4%)                      | 9.4 (6.73)                              | 46 (5.1%)                                    | <0.0001 |
| Stress (PSS-14)                         | 26.0 (9.78)              | 185 (6.2%)                   | 25.3 (9.83)                   | 117 (5.6%)                     | 27.6 (9.48)                             | 68 (7.5%)                                    | <0.0001 |
| Physical Limitation (SAQ)               | 80.6 (25.79)             | 74 (2.5%)                    | 83.5 (23.83)                  | 48 (2.3%)                      | 73.9 (28.75)                            | 26 (2.9%)                                    | <0.0001 |
| Anginal Frequency (SAQ)                 | 83.2 (20.77)             | 9 (0.3%)                     | 84.8 (19.12)                  | 7 (0.3%)                       | 79.4 (23.71)                            | 2 (0.2%)                                     | <0.0001 |
| Treatment satisfaction (SAQ)            | 91.8 (13.02)             | 25 (0.8%)                    | 92.4 (12.12)                  | 18 (0.9%)                      | 90.2 (14.76)                            | 7 (0.8%)                                     | <0.0001 |
| Quality of Life (SAQ)                   | 57.4 (24.95)             | 18 (0.6%)                    | 59.6 (24.35)                  | 12 (0.6%)                      | 52.6 (25.63)                            | 6 (0.7%)                                     | <0.0001 |
| General health, SF-12 (PCS)             | 43.0 (12.09)             | 142 (4.8%)                   | 44.6 (11.53)                  | 101 (4.9%)                     | 39.3 (12.53)                            | 41 (4.5%)                                    | <0.0001 |
| General health, SF-12 (MCS)             | 45.5 (12.41)             | 142 (4.8%)                   | 46.2 (12.12)                  | 101 (4.9%)                     | 43.9 (12.94)                            | 41 (4.5%)                                    | <0.0001 |

BMI (body mass index); CVD (cardiovascular disease); MI (myocardial infarction); COPD (chronic obstructive pulmonary disease); PAD (peripheral artery disease); ASA (aspirin at arrival); CAD (coronary artery disease); STEMI (ST-Elevation MI); NSTEMI (Non-

ST Elevation MI); CCU/ICU (coronary care unit / intensive care unit); ACEi/ARBs (angiotensin converting enzyme inhibitors / angiotensin receptor blockers); ESSI-5 (ENRICH Social Support instrument); PHQ-9 (Patient Health Questionnaire-9); PSS-14 (Perceived Stress Scale), SAQ (Seattle Angina Questionnaire); SF-12 PCS (Short Form-12 physical component score); SF-12 MCS (Short Form-12 mental component score)

**Table S2. Baseline characteristics of young patients with AMI stratified by sex who were readmitted versus not readmitted at 1-year (10 final candidate variables).**

|                                            | <b>All patients<br/>(N=2979)</b> | <b>Women<br/>(N=2007; 67.3%)</b> | <b>Men<br/>(N=972; 32.6%)</b> | <b>P-Value</b> |
|--------------------------------------------|----------------------------------|----------------------------------|-------------------------------|----------------|
| PHQ-9 (Depression), Mean (SD)              | 7.8 (6.45)                       | 8.7 (6.62)                       | 6.0 (5.69)                    | <0.0001        |
| SF-12 (PCS), Mean (SD)                     | 43.0 (12.09)                     | 41.9 (12.19)                     | 45.3 (11.54)                  | <0.0001        |
| Complication - Heart failure               | 215 ( 7.2%)                      | 160 ( 8.0%)                      | 55 ( 5.7%)                    | 0.0212         |
| History of COPD                            | 346 ( 11.6%)                     | 284 ( 14.2%)                     | 62 ( 6.4%)                    | <0.0001        |
| Diabetes                                   | 1058 ( 35.5%)                    | 799 ( 39.8%)                     | 259 ( 26.6%)                  | <0.0001        |
| Low income                                 | 1262 ( 42.4%)                    | 956 ( 47.6%)                     | 306 ( 31.5%)                  | <0.0001        |
| Prior MI                                   | 635 ( 21.3%)                     | 413 ( 20.6%)                     | 222 ( 22.8%)                  | 0.1576         |
| Hospital length of stay in Days, Mean (SD) | 4.2 (3.93)                       | 4.4 (4.20)                       | 3.9 (3.31)                    | 0.0019         |
| Unemployed                                 | 1151 ( 38.6%)                    | 879 ( 43.8%)                     | 272 ( 28.0%)                  | <0.0001        |

**Table S3. BMA preliminary results showing predictors of 1-year readmission post AMI (among the subset of admissions with no history of prior AMI from a single imputation) (Odds ratio for readmitted vs. not readmitted).**

| <b>Obs</b> | <b>Variable</b>                | <b>Estimate</b> | <b>StdErr</b> | <b>ProbChiSq</b> | <b>OR</b> | <b>LCLor</b> | <b>UCLor</b> |
|------------|--------------------------------|-----------------|---------------|------------------|-----------|--------------|--------------|
| 1          | Intercept                      | -0.5853         | 0.4617        | 0.2049           | 0.56      | 0.23         | 1.38         |
| 2          | Depression (PHQ-9)             | 0.0313          | 0.00981       | 0.0014           | 1.03      | 1.01         | 1.05         |
| 3          | Physical health (SF-12)        | -0.0210         | 0.00525       | <.0001           | 0.98      | 0.97         | 0.99         |
| 4          | Obstructive CAD >=50%          | 0.3330          | 0.2061        | 0.1062           | 1.40      | 0.93         | 2.09         |
| 5          | Diabetes                       | 0.2931          | 0.1255        | 0.0195           | 1.34      | 1.05         | 1.71         |
| 6          | Female sex                     | 0.3123          | 0.1372        | 0.0228           | 1.37      | 1.04         | 1.79         |
| 7          | GRACE score                    | -0.00707        | 0.00350       | 0.0434           | 0.99      | 0.99         | 1.00         |
| 8          | Low Income                     | 0.2053          | 0.1298        | 0.1137           | 1.23      | 0.95         | 1.58         |
| 9          | Marital status                 | -0.1208         | 0.1252        | 0.3347           | 0.89      | 0.69         | 1.13         |
| 10         | Hospital length of stay (Days) | 0.0348          | 0.0153        | 0.0228           | 1.04      | 1.00         | 1.07         |

Figure S1. VIRGO enrollment sites in United States (N=103 hospitals).

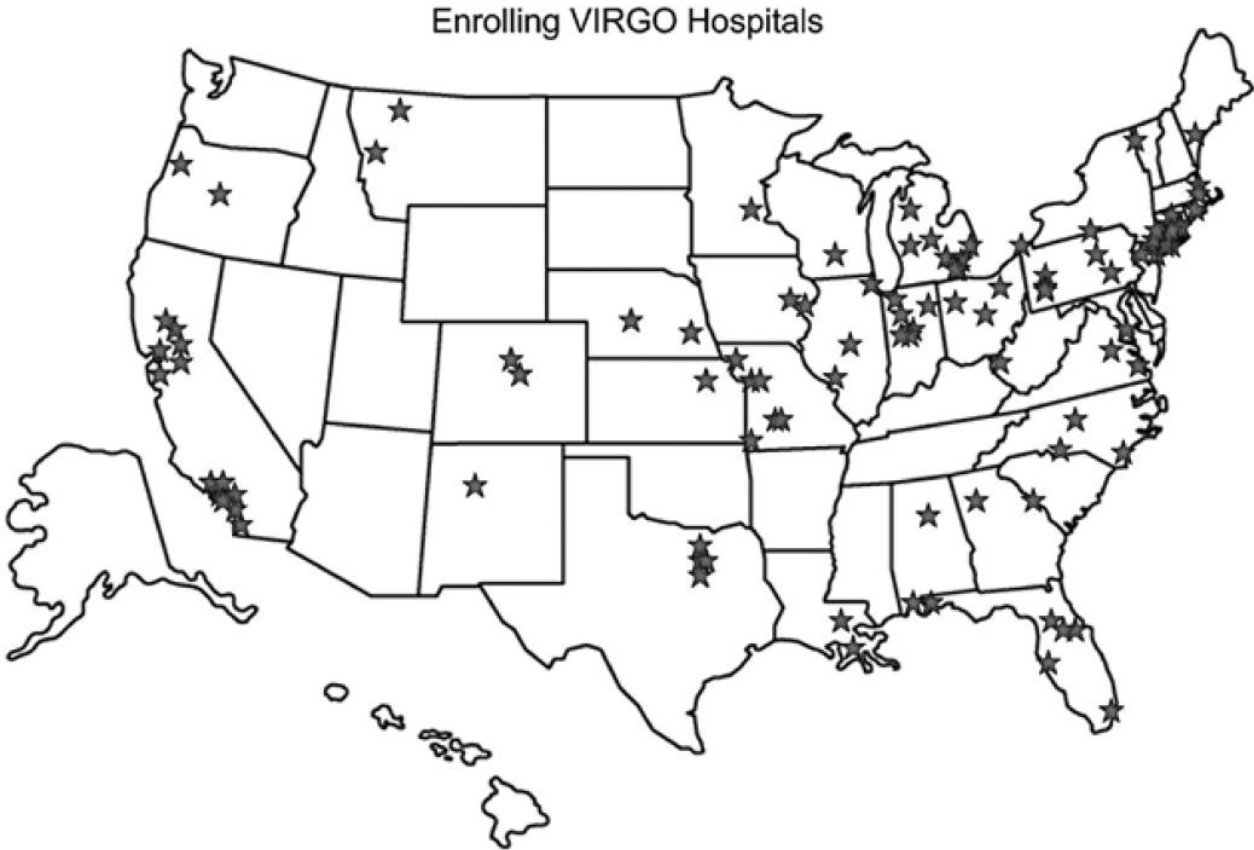

**Figure S2. Timing of 1-year readmissions: Kaplan-Meier curve for survival free from hospital readmission within 1-year of discharge among patient readmitted.**

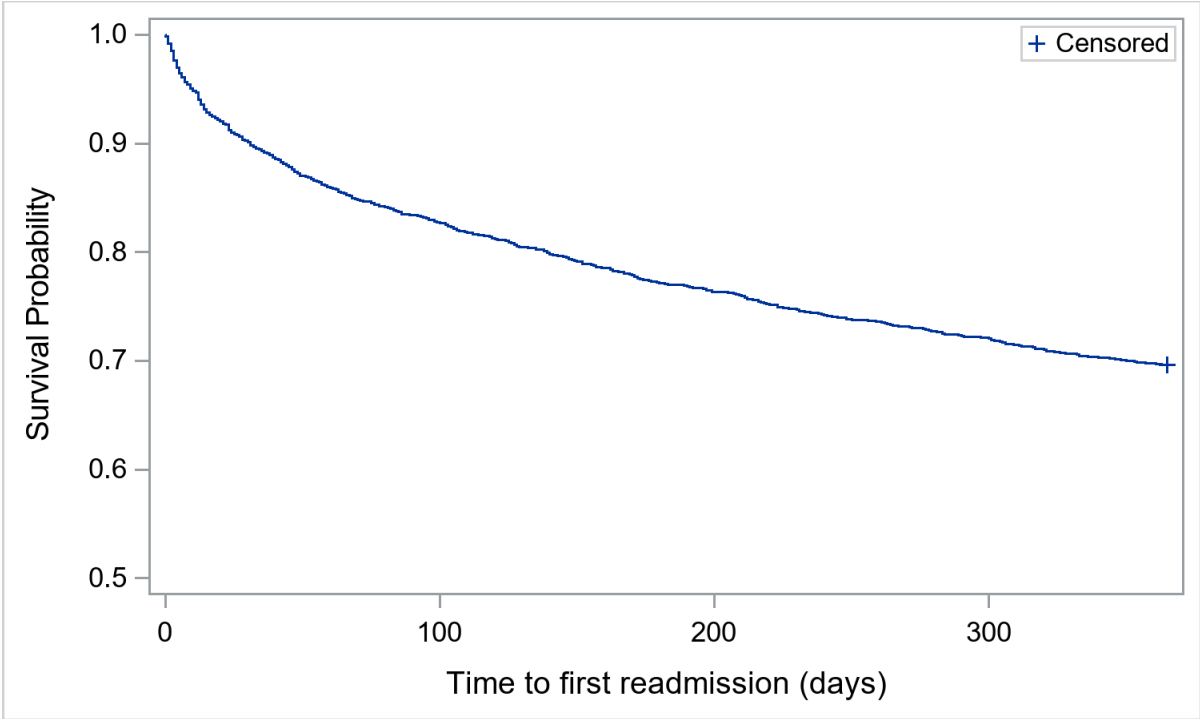

Figure S3. Calibration plots for the development and validation cohorts of predictors of readmission after a first AMI event.

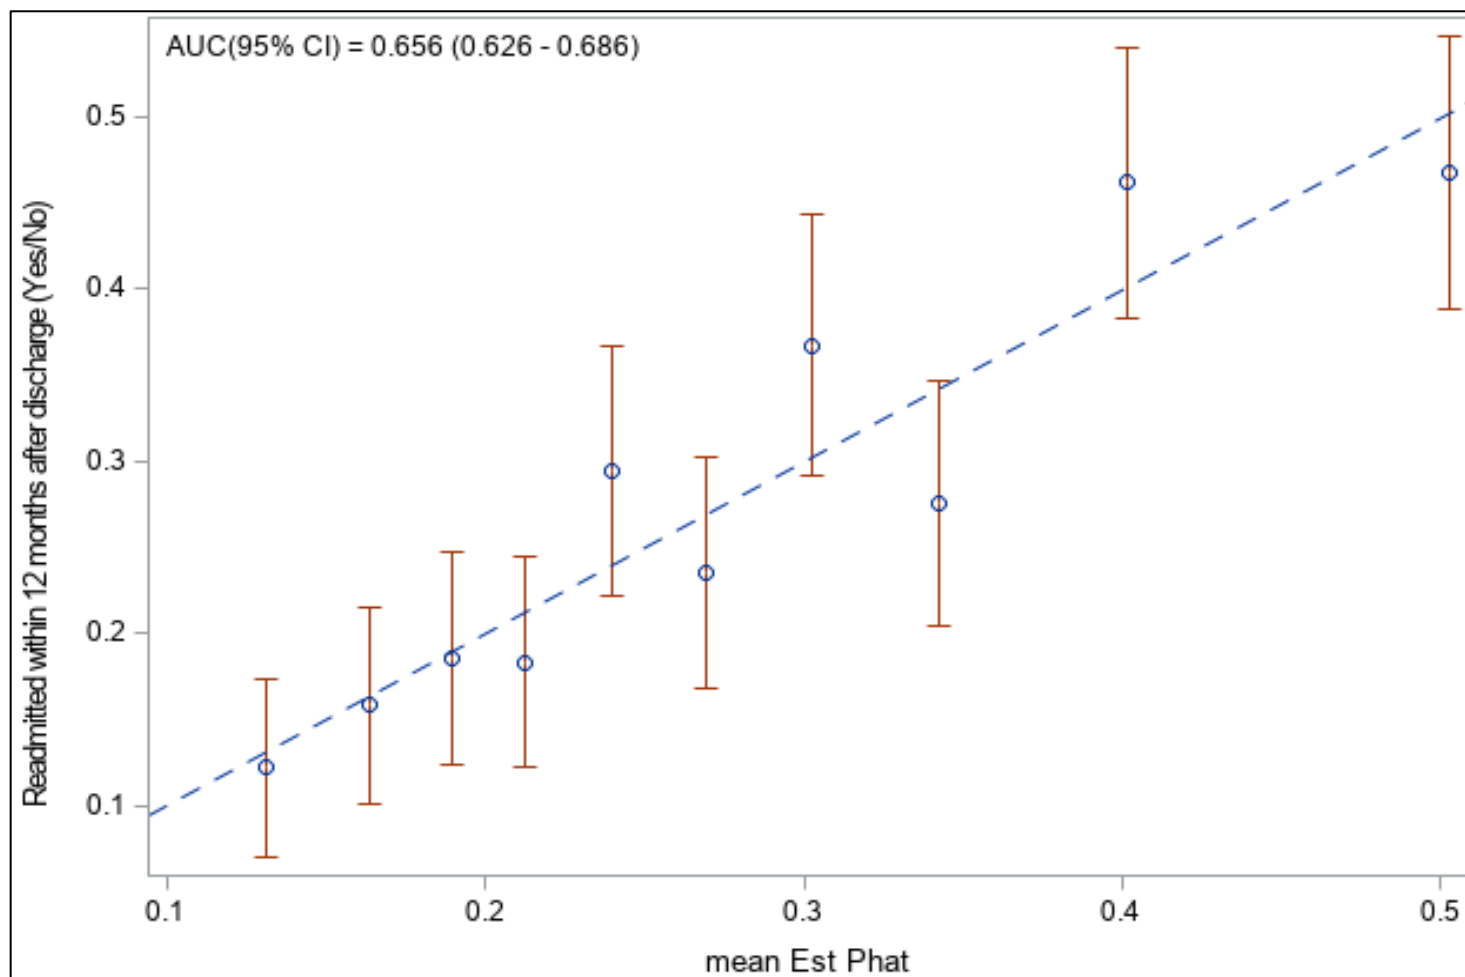

Supplement: JAH3-10-e021047-s001.pdf [file JAH3-10-e021047-s001.pdf]
